# Supplementary material for: Applicability of the pipe-model theory to seedlings of hinoki cypress (Chamaecyparis obtusa)
Source: Research Square preprint supplement (doi:10.21203/rs.3.rs-3977523/v1), 2024-02-27
Supplement: Supplementary file 1 [file c1bf7586f85893f0fed4e383.xlsx]

## Sheet: Table1
Table 1. Summary of the sizes (mean±SD) mesured on the first and last periods for 1-year-old and 2-year-old C. obtusa seedlings.
Age	Measurement date	Planted density [m-2]	Seeedling height [cm]	Crown base height [cm]		Stem diameter [cm]		n	LAI
					at the ground level	at one-tenth of the height	at the crown base		[m2 m-2]
1-year-old	Apr. 25, 1985 (first)	60	12.4±3.7	0.4±0.5	n/a	0.133±0.029	0.144±0.032	25	0.14
	Mar. 28, 1986 (last)		26.2±8.2	2.9±1.8	n/a	0.340±0.099	0.345±0.114	25	0.84
2-year-old	Oct. 6, 1981 (first)	62	25.2±5.6	2.4±6.0	0.389±0.079	0.349±0.070	0.372±0.078	25	1.54
	Oct. 18, 1982 (last)		51.0±15.7	2.3±1.4	0.715±0.205	0.594±0.173	0.657±0.200	30	5.16
n: number of sample trees.
LAI: Leaf area index
